# Supplementary material for: Characterization of a novel disease-causing mutation in exon 1 of SH2D1A gene through amplicon sequencing: a case report on HLH
Source: BMC Med Genet. 2017 Feb 14;18:15. doi: 10.1186/s12881-017-0376-9 (PMC5310059; doi:10.1186/s12881-017-0376-9)
Supplement: Additional file 1 — Table S1: List of primers that were used for amplicon sequencing. (XLSX 19 kb) [file 12881_2017_376_MOESM1_ESM.xlsx]

## Sheet: Sheet1
List of primers that were used for amplicon sequencing
Amplicon_ID	Ion_AmpliSeq_Fwd_Primer*	Ion_AmpliSeq_Rev_Primer*	Gene_Symbol	Genome_Version	Chr	Amplicon_Start	Amplicon_Stop
AMPL5269684610	GTGGAAGCAGCCTCCAAGTTT	CTGGACGTGACTCCTAAGCC	PRF1	hg19	chr10	72360009	72360262
AMPL5115419371	GCCCTGTCCGTCAGGTACT	CACAAGATGACGGCCTCCTT	PRF1	hg19	chr10	72358362	72358621
AMPL5145520838	CAAGCTTGGTCTAATGGGAATACGA	CAACCTGAATCATGGCCACCTAA	PRF1	hg19	chr10	72357713	72357947
AMPL5269922969	CACAGACACATGCACATTGCT	GGCTCCTTCCCAGTGGAC	PRF1	hg19	chr10	72360218	72360490
AMPL5115400715	ACCTGGCATGATAGCGGAATT	ACGGATGCCTATGTGAAGCTC	PRF1	hg19	chr10	72357904	72358174
AMPL5115421125	GCTCCCGGTAGGTTTGGTG	CCGCCTACCTCAGGCTTATCT	PRF1	hg19	chr10	72358582	72358848
AMPL5269998872	GCCGCAGGAACCTTTGTGT	GGAGCAGTCATCCTCCATCC	PRF1	hg19	chr10	72360454	72360728
AMPL4323084197	AAGTGGGTGCCGTAGTTGG	GCAGTCCTGAAGGAGTTATTTGATTGA	PRF1	hg19	chr10	72358809	72359014
AMPL5115418221	GCTCCTGGCCACCAAAGAA	TGAGGAGGGCCCTGAGTC	PRF1	hg19	chr10	72358135	72358398
AMPL3541180675	AACTGTGGTTGGGCAGATACAAT	TCTGGGACACTCGGTATGTATAAATGT	SH2D1A	hg19	chrX	123499424	123499648
AMPL4327275735	CATTGTAATACCTCTGCAGTATCCAGTT	GCACATAAATTGTCACCTCTCATTTGAC	SH2D1A	hg19	chrX	123504103	123504326
AMPL5269216171	GGAGTCAGGTGGTTGACTTGT	CCATGTCCACCGTATCATACTCA	SH2D1A	hg19	chrX	123480399	123480653
AMPL2985337130	AGTTTATTCTTTCACAGGTATCACGGTT	CCATGAACAATTTTGGATTGGAGCTTTA	SH2D1A	hg19	chrX	123499594	123499816
AMPL5227298872	GTCATTGTGAGTTTTATGCAGTTGGA	TTCCATTACAGGACTACAATGGCTTT	SH2D1A	hg19	chrX	123505095	123505369
AMPL5269180773	TCTTAGCATCCCTAGCACATTTTGT	TGTACTTCTAGCTGAGGACTTCTTCTC	SH2D1A	hg19	chrX	123503942	123504157
AMPL765400349	CGTGTACTGCCTATGTGTGCTG	CGAGGGATTGAGGCGAAAGTG	SH2D1A	hg19	chrX	123480609	123480816
AMPL5269302613	GAATACAAAATTGGGACTGCTGAGTA	CCGTCTCGAACACGATGTCC	STX11	hg19	chr6	144507654	144507876
AMPL5143916595	GAAGTCTCGGGCGACCAG	CGGTGTAGTCGACCGTCTTT	STX11	hg19	chr6	144508275	144508533
AMPL5115380370	GTTTGACTCGCCCCACGA	CCTCGCTCAGCTCCTTCAT	STX11	hg19	chr6	144507839	144508101
AMPL5144011150	CGTCATCGAGCTCAACGTACA	ACCTGGCGTTTCTTTTCTAAAGACT	STX11	hg19	chr6	144508493	144508767
AMPL5115394001	GCGAGGTCATCCACTGCAAG	CTGCTCGAACATGTCCTCGAT	STX11	hg19	chr6	144508054	144508313
AMPL5268668876	CCTGGATTTCGAGCCTGGA	GGGATAACAAAGGCTGAGTCAAG	STXBP2	hg19	chr19	7707782	7708025
AMPL553923338	GGGAGAAGATCAAGGACTCCA	TGAGTGCAAATGACCCAAGGA	STXBP2	hg19	chr19	7709528	7709742
AMPL3535914397	CCATGGCGTATGATCTGCTG	CTCCACCCACAAGTCATCGT	STXBP2	hg19	chr19	7707177	7707390
AMPL3535920479	GGGACCCCGACTTTCACCTA	CTTCAACGTCTTCACCACCTTTG	STXBP2	hg19	chr19	7705647	7705853
AMPL3674221162	GGGTCCACGTGGGTGAC	CTCCCAGCCGCCATGAA	STXBP2	hg19	chr19	7701956	7702169
AMPL3675539786	GGTGGTCCCTAAGTGGGTTTC	CGCCGTTTGTTGATGTCTTCAA	STXBP2	hg19	chr19	7704473	7704641
AMPL3815251168	GCCTGGGTCTGTGTTAGGT	CTCATCTCTGACATGGCCACA	STXBP2	hg19	chr19	7712162	7712344
AMPL5115367190	GGTGTTCTCCCTCGATGCTC	CACAAGAGAGGTTAAAGGTTAGGTGTT	STXBP2	hg19	chr19	7706590	7706819
AMPL5214798617	CCATCCCCCACCCTACCA	AGGCTTAGCACCTCAGCAG	STXBP2	hg19	chr19	7711039	7711313
AMPL5269026956	CTCAACCCCATGCTCTGTCT	GTTCAGCCCCTCCCCAA	STXBP2	hg19	chr19	7707974	7708200
AMPL553677549	CCCAAGGCTGAGAAGGCTT	GGTCCCACATTCAGGGTCTT	STXBP2	hg19	chr19	7703535	7703739
AMPL553885269	CACTAGCACAGGGTACTGAGG	CTGCTCCAGGTTACGGATGAG	STXBP2	hg19	chr19	7709941	7710165
AMPL3541267785	GCCGTCTTGCTGGACGA	CTCATGAGGGCCAAAGACTTG	STXBP2	hg19	chr19	7707352	7707523
AMPL3674219934	AGGAGGTGGAGATGCTGGTT	GGGCCACAGGTTCCTGTC	STXBP2	hg19	chr19	7711925	7712086
AMPL4322946491	TCCCTTCCTCTGTTCCTACTAGTTG	CGTATACACATGCACACATGCAAT	STXBP2	hg19	chr19	7704595	7704796
AMPL4323095944	CCGGCTCATCGTGTATGTCAT	GTCCCTGACTCCAAGGACTCT	STXBP2	hg19	chr19	7712297	7712501
AMPL5115358097	GGAGAGCCTAGGGTGTTGGT	CAGTGTCTGTTTCTGAGGGAACA	STXBP2	hg19	chr19	7705704	7705967
AMPL5268662901	CCCTGGCCCCTGACTCT	GGGAGCGGGTTTTCTCTGG	STXBP2	hg19	chr19	7706838	7707110
AMPL553914753	TGAGAGACCTGGTGCTGAGAT	CACCGGAACGATCAGCTTCA	STXBP2	hg19	chr19	7709364	7709568
AMPL3674220212	GGCTGGACAGGAACCTGTG	GCCTTGTTCTTGTGCCAGTGA	STXBP2	hg19	chr19	7712064	7712272
AMPL3674221867	CCTCCAATTCGGCAAAGCA	GTAGAGGTTGTAGGTGCTGTGG	STXBP2	hg19	chr19	7706460	7706632
AMPL3674257405	CCAATGTACAGGCGCACA	GCTTTTGGCCTCCCAGCAA	STXBP2	hg19	chr19	7710122	7710327
AMPL4239926025	TGTTTGCACATGGTGGCAGAT	TGAAGAAGATATGGGCCGCTTT	STXBP2	hg19	chr19	7705516	7705689
AMPL5115357764	GAAACTGCCCCTCCCACTG	ATCCTACACTCAAGGGCTGAA	STXBP2	hg19	chr19	7703812	7704077
AMPL5115367614	CCAGACTGGCCTCCAATTTCA	GTCTCAGTCCAGGCTCGAAA	STXBP2	hg19	chr19	7707540	7707807
AMPL5268987004	GACCGGGAGCCTGTCAA	GGCACTGGCTGGCAGAG	STXBP2	hg19	chr19	7712542	7712768
AMPL5269021329	AGGCAGACACTCCCAGTCT	CCTGTATGTGTCCTGCTCTATGTC	STXBP2	hg19	chr19	7706979	7707220
AMPL550893193	CGAAGTGGCTCTCTGCAATGA	ACCTCCAGTTCCAACTCATCCA	UNC13D	hg19	chr17	73836180	73836334
AMPL551216964	CGCACCTCCACAAACTTGAC	GCTGCTCTATGAATGAAGGAAGGA	UNC13D	hg19	chr17	73830996	73831218
AMPL5268928939	GCTACCGGCTTGGAGGA	GTCACCCAGCACGAGGTAT	UNC13D	hg19	chr17	73835845	73836113
AMPL552525385	CTTCAGGTGGAACCATTCAGTG	AGATGAAGGCCTTTGGAGAACTG	UNC13D	hg19	chr17	73832308	73832490
AMPL552678542	CTCGCCTTCCAGGTCGTC	GCTGGTTCCCAACACCAAGT	UNC13D	hg19	chr17	73824968	73825155
AMPL5269625486	CCATGTCATTCACCACCACACAC	TGGATCAGTTCCCTCTGTCCAA	UNC13D	hg19	chr17	73830588	73830830
AMPL2985164564	CACTGACCCCTCCTGGTAACT	GTGACAGTCAAGGCCTCCTAC	UNC13D	hg19	chr17	73826312	73826533
AMPL2985224837	TCTCCCCAGGGTGGAGTAG	CGCCAGGCCATCAAGATAAGG	UNC13D	hg19	chr17	73840159	73840373
AMPL2985459876	CTGCTGAAGAGCCAGGAGATG	CATCGAGTACCAGTGGATCCAG	UNC13D	hg19	chr17	73832775	73832924
AMPL3535948034	CCATGGAGAAGAGGTGGATCTTGA	ACAAGATCTTCCACAAGTGAGCAG	UNC13D	hg19	chr17	73831959	73832108
AMPL3536052644	ACACCTACCCCCTGCTCAAT	CCACTTCCAAGAAGCCCTGTAG	UNC13D	hg19	chr17	73838646	73838849
AMPL3674340479	GGCCAGGACTCCATCCCT	GAGATGGGCGAGAGTCTGTTC	UNC13D	hg19	chr17	73831595	73831804
AMPL3675702623	CTGGACATAGGTGAGTGCCA	CAGGTAACAGAACCGGTCACA	UNC13D	hg19	chr17	73827108	73827326
AMPL5115359017	CACCCCAGCATCCAGTGT	GGATGGGAAGGGAAGGGATCT	UNC13D	hg19	chr17	73836760	73837013
AMPL5115374017	AAAATATTGGCTTCTGGAGGGACA	CTGAGCTGCTGCGATACCT	UNC13D	hg19	chr17	73838992	73839265
AMPL5115376149	TTATCTTTGACACCAAGGCCTTCA	GTCTAAACTCAGGCCCTAAGGAA	UNC13D	hg19	chr17	73830070	73830305
AMPL5146330145	GGTGCTGGGATGTGGTAGAGA	CACCGTAGCCGTAGAGGTTTG	UNC13D	hg19	chr17	73823796	73824053
AMPL550462381	GCTACAGGGCTTCTTGGAAGT	CTGTCCCTCCAGAAGCCAATATTT	UNC13D	hg19	chr17	73838827	73839016
AMPL550994607	CCTTGAGGCTGATGTAGAGCTG	CCTCAAGATCCACCTCTTCTCCAT	UNC13D	hg19	chr17	73831762	73831984
AMPL551205455	GAAGAGCCAGGAGATGCTTTAGG	CCCCATCACCAGCATCGAG	UNC13D	hg19	chr17	73832780	73832936
AMPL5268877932	CACGTGGAAGGCCTGGT	CCCATGGCGAGAGGTGTT	UNC13D	hg19	chr17	73839143	73839415
AMPL5268946927	TGGAAGCAGATCTCCAGGTTCT	TCAAGAGCGTCTTTGCTTCCT	UNC13D	hg19	chr17	73827231	73827503
AMPL552110638	ACCCGACCTACCCGCTTA	AGGCTCTGTGTCCTCACAAAG	UNC13D	hg19	chr17	73836295	73836519
AMPL552284264	GGGATGTTCAGAGCGGGTTA	TGGATAATTTCCACCGCTGGTTC	UNC13D	hg19	chr17	73831380	73831593
AMPL5269642890	GGGACAGAGATGCAGAGCTT	CCCAAGTCGCTGAAATTCCCAT	UNC13D	hg19	chr17	73830615	73830887
AMPL553775213	AAGAGTTCCTTAGGGCCTGAGT	GCCATGAGATCCGCACTGG	UNC13D	hg19	chr17	73830278	73830446
AMPL5269670035	CTACCTCCCGACCTGGCTAT	CAACCCATGGTGCAGGTGA	UNC13D	hg19	chr17	73832065	73832295
AMPL553958314	CGCAGCTTCTGCTCAGAGG	CGGGAACTCATCCGGAAGTA	UNC13D	hg19	chr17	73826490	73826703
AMPL3017100515	GGGATCCTGTAGATCTCTGACTCT	GCTCTTTGCATAATCCTGTGGCTT	UNC13D	hg19	chr17	73840323	73840492
AMPL3535906662	TGGAAGTCGGATAGGTCCTTCT	GCAGCTTGTGTCCCACGA	UNC13D	hg19	chr17	73835932	73836132
AMPL3675708091	CAAACTCTTGTCCCAGATGCC	GGACCTTCACCCATTGTTTGATGA	UNC13D	hg19	chr17	73825960	73826144
AMPL5115383772	CAGGAAAGCCCTTGCAAGTC	ACACTCTTCTCTGCCACCAC	UNC13D	hg19	chr17	73823989	73824239
AMPL5115389595	GGAAGCAGAGAGAGTGCCTAC	TGGCAGGGATAGGCTACAACT	UNC13D	hg19	chr17	73836935	73837190
AMPL5214824414	GTGCCAGTCTGTCGACAAAGA	CTGCAGGAGTGGGAGAATTGT	UNC13D	hg19	chr17	73832330	73832593
AMPL550475480	TGTTTCACTGTTGCCTTCAGACA	GGTCAGGGAGCTTGAGGTAAC	UNC13D	hg19	chr17	73838970	73839110
AMPL551207296	CGACCCTGGATCCACTGGTA	TTTCAGCCTGTACTGGTGGATG	UNC13D	hg19	chr17	73832898	73833110
AMPL551211885	GGGCATGGGAATTTCAGCGA	CCAGAGGAGGCCTTCATGATTAC	UNC13D	hg19	chr17	73830862	73831039
AMPL552287497	GGGCCTCGTTGTACGTCTTC	GCATGAGCTCCTCAGAGAGGT	UNC13D	hg19	chr17	73831525	73831746
AMPL5269637156	CAGGGTCAGCAGGGTCA	CGGACATGTTACCCTTGACAGT	UNC13D	hg19	chr17	73826583	73826839
AMPL5269650942	GCCAGGACGACCTACTCATCT	GGTTCAGCGACCCCTACTG	UNC13D	hg19	chr17	73838422	73838694
AMPL5269706386	GTGCGGTCGGACAAGGTA	CAGGAAGCTCTGCATCTCTGTC	UNC13D	hg19	chr17	73830387	73830638
AMPL553814051	GGTCGCCAATGACATCCTGTA	CTCTTTGTCGACAGACTGGCA	UNC13D	hg19	chr17	73832133	73832351
AMPL553851826	CAAGTTGCTTGCTGCCATCA	CCATACCCTTGGCCTGGAT	UNC13D	hg19	chr17	73839476	73839700
AMPL3536008109	CAATACCTCGTGCTGGGTGA	GCGGGTAGGTCGGGTACT	UNC13D	hg19	chr17	73836093	73836309
AMPL4323041443	GGACCCACTCACAATTCAAAGGT	CGCTGAGCAGAGCATAGCTG	UNC13D	hg19	chr17	73826097	73826310
AMPL5214814995	GCTGCTACACCCCTCAGA	CAGCCCTGTTTCCTCCCT	UNC13D	hg19	chr17	73828945	73829219
AMPL5214819893	CACTACATCACCCACAACCGT	GATAGCCAGGTCGGGAGGTA	UNC13D	hg19	chr17	73831811	73832085
AMPL5215488927	CAGGCTCAGCTTTGTGAGGA	GGGTGCAGGCTCCTTTGG	UNC13D	hg19	chr17	73836490	73836764
AMPL5268884369	GTCTCCAGGGAAGCTGTTCTC	GCTGGACTACGACACGCT	UNC13D	hg19	chr17	73824761	73825010
AMPL5268985846	CTGCACTCACTCCTCCAACAAT	CAGCTGTCTAGGCCCCTAAAG	UNC13D	hg19	chr17	73832556	73832816
AMPL5269290067	TGCTATCGTTTTTGTTCCTTGTGGA	GCAAATGCTAATGGAATTCAATCCTGAT	XIAP	hg19	chrX	123040911	123041134
AMPL553267848	GTCTTGTTTTAAGCTGTGAGATTTTCATGT	CCTCCTCCACAGTGAAAGCA	XIAP	hg19	chrX	123022346	123022508
AMPL3674231320	CCATCTTCCAAAATCCTATGGTACAAGA	GCATACTGTCTTTCTGAGCATTCAC	XIAP	hg19	chrX	123034349	123034510
AMPL3814967434	TGATGGAGATTATATCTTTGCTTATACTTCACT	ATATAAATTATATGAGACTTACCAGACACTCCT	XIAP	hg19	chrX	123025015	123025188
AMPL5144090768	AAAAGTCTGTTGCTTGTGTTTCACA	GCACGGTATCTCCTTCACCAGTA	XIAP	hg19	chrX	123019422	123019696
AMPL5144777762	GCTCACCTAACCCCAAGAGAGT	GAATATTAAGATTCCGGCCCAAAACAA	XIAP	hg19	chrX	123020041	123020224
AMPL2943533329	TGTTTTCGTAGGTGAAGGTGATAAAGT	CCATAGTGAAGGCAAAAATAGTTGAGGT	XIAP	hg19	chrX	123022458	123022666
AMPL3674248096	CTTGAGGTTCTGGTTGCAGATCTA	ACTAACACACAGCATTAAGGTTACGTTT	XIAP	hg19	chrX	123034462	123034677
AMPL4229201915	CTTATGACTTCCTTCTAGCTCCATCAG	CTTCTAGTTAGTGATGGTGTTTTCTCAGT	XIAP	hg19	chrX	123026412	123026618
AMPL5144295395	GGCACGAGCAGGGTTTCTTTA	TCTCTGCTTCCCAGATAGTTTTCAAC	XIAP	hg19	chrX	123019653	123019886
AMPL5215538497	GGCGACACTTTCCTAATTGCTTCT	GCATACTTGGGAAGCTATTTATTGGTTTT	XIAP	hg19	chrX	123020174	123020432
AMPL5269241026	GGCACTTGTTGGGTGCTT	CAGCACATTGTTTACAAGTGACTAGATG	XIAP	hg19	chrX	123040730	123040963
AMPL2943482570	GGTAACATTTTACTTTGTGGCTCCTT	CAGACACTCCTCAAGTGAATGAGTTA	XIAP	hg19	chrX	123024946	123025166
AMPL3674222462	GCAAGAGCTGGATTTTATGCTTTAGGTAA	GGTTCAACATAAGAGTTCACGGAATAAT	XIAP	hg19	chrX	123020365	123020549
AMPL3674229590	TGGTTTGTTTTTATTCTTTCGCTTGCT	CCTTGAAACTGAACCCCATTCGTATA	XIAP	hg19	chrX	123034215	123034405
AMPL5144543140	CTGGTATCCAGAATGGTCAGTACAAA	TGTAGTAGAGTCCAGCACTTGCTA	XIAP	hg19	chrX	123019835	123020086
1.These are all primers used for amplicon sequencing, and several pairs of primer were designed for each gene to covere the whole loci.
2.Both "Amplicon start" and "Amplicon_stop" refers to the position on chromosome of each primer;these primers were designed based on human genome HG19.
